# Supplementary material for: Photoluminescence and magnetic properties of isostructural europium(iii), gadolinium(iii) and terbium(iii) oxamate-based coordination polymers
Source: Royal Society of Chemistry journal article supplement (doi:10.1039/d4dt01290a), 2024-01-01
Supplement: d4dt01290a1.pdf [file d4dt01290a1.pdf]

## ELECTRONIC SUPPLEMENTARY INFORMATION

### Photoluminescent and Magnetic Properties of Isostructural Europium(III), Gadolinium(III) and Terbium(III) Oxamate-Based Coordination Polymers

Cleverton O. C. da Silveira,<sup>a</sup> Willian X. C. Oliveira,<sup>a</sup> Eufrânio N. da Silva Júnior,<sup>a</sup> Meiry E. Alvarenga,<sup>b</sup> Felipe T. Martins,<sup>b</sup> Claudia C. Gatto,<sup>c</sup> Carlos B. Pinheiro,<sup>d</sup> Emerson F. Pedroso,<sup>e</sup> Júlia P. O. Silva,<sup>f</sup> Lippy F. Marques,<sup>f</sup> Moliria V. Santos,<sup>g</sup> Francisco R. Torres,<sup>h</sup> Rividy Euclides,<sup>i</sup> Ricardo O. Freire,<sup>i</sup> Wallace C. Nunes,<sup>j</sup> Adriele A. de Almeida,<sup>k</sup> Marcelo Knobel<sup>k</sup> and Cynthia L. M. Pereira,<sup>a,\*</sup>

<sup>a</sup>Departamento de Química, Instituto de Ciências Exatas, Universidade Federal de Minas Gerais. Av. Antônio Carlos 6627, Pampulha, Belo Horizonte, Minas Gerais, 31270-901 Brazil. e-mail: cynthialopes@ufmg.br;

<sup>b</sup>Instituto de Química, Universidade Federal de Goiás, Campus Samambaia Setor Itatiaia, Caixa Postal 131, Goiânia, Goiás, 74001970, Brazil;

<sup>c</sup>Instituto de Química, Universidade de Brasília, Asa Norte, Brasília, Distrito Federal, 70904970, Brazil;

<sup>d</sup>Departamento de Física, Instituto de Ciências Exatas, Universidade Federal de Minas Gerais. Av. Antônio Carlos 6627, Pampulha, Belo Horizonte, Minas Gerais, 31270-901 Brazil;

<sup>e</sup>Departamento de Química, Centro Federal de Educação Tecnológica de Minas Gerais, Av. Amazonas, 5253, Belo Horizonte, MG, 30421-169, Brazil;

<sup>f</sup>Grupo de Química de Coordenação e Espectroscopia de Lantanídeos (GQCEL), Universidade do Estado do Rio de Janeiro, Centro de Tecnologia de Ciências, Instituto de Química, Maracanã, Rio de Janeiro, 20550-900, Brazil;

<sup>g</sup>Biosmart Nanotechnology Ltda, Avenida Jorge Fernandes de São Mattos, 311, box 4, Araraquara, 14808-162, SP, Brazil;

<sup>h</sup>Departamento de Química, Faculdade de Filosofia, Ciências e Letras de Ribeirão Preto, Universidade de São Paulo, 14040901 - Ribeirão Preto, SP, Brazil;

<sup>i</sup>Pople Computational Chemistry Laboratory, Departamento de Química, Universidade Federal de Sergipe, São Cristóvão-SE, 49100-000, Brazil;

<sup>j</sup>Instituto de Física, Universidade Federal Fluminense, Av. Gal. Milton Tavares de Souza, s/nº, Niterói 24210-346, RJ, Brazil;

<sup>k</sup>Instituto de Física Gleb Wataghin, Universidade Estadual de Campinas, Rua Sérgio Buarque de Holanda, 777, Cidade Universitária Zeferino Vaz, Barão Geraldo, Campinas, SP, 13083-859, Brazil.

## 1. Experimental details of solid-state photophysical studies

### 1.1. Experimental photophysical studies

Experimental intensity parameters,  $\Omega_\lambda$ , for the  $\text{Eu}^{3+}$  coordination polymer was determined from the emission spectra using the following Eq. 1:<sup>1,2</sup>

$$\Omega_\lambda = \frac{3hc^3 A_{0 \rightarrow J}}{4e^2 \omega^3 \chi \left\langle {}^7F_J \left\| U^{(\lambda)} \right\| {}^5D_0 \right\rangle^2} \quad (1)$$

where  $\chi$  is the Lorentz local field correction term, given by  $\chi = n(n+2)^2/9$  and  $\left\langle {}^7F_J \left\| U^{(\lambda)} \right\| {}^5D_0 \right\rangle^2$  is a squared reduced matrix element with value of 0.0032 for the  ${}^5D_0 \rightarrow {}^7F_2$  transition and 0.0023 for the  ${}^5D_0 \rightarrow {}^7F_4$  one. The refractive index ( $n$ ) has been assumed equal to 1.5. In this work, the  ${}^5D_0 \rightarrow {}^7F_6$  transition was not observed experimentally; thus, the experimental  $\Omega_6$  parameter could not be estimated. The spontaneous emission coefficient,  $A_{01} = 0.31 \times 10^{-11}(n)^3(\nu_{01})^3$ , leading to an estimated value around  $50 \text{ s}^{-1}$  for the refractive index ( $n$ ) defined above. In Eq. (1), the  $A_{0\lambda}$  term, where  $\lambda = 2$  and  $4$ , represents the spontaneous emission coefficients of the  ${}^5D_0 \rightarrow {}^7F_2$  and  ${}^5D_0 \rightarrow {}^7F_4$  transitions, which can be calculated from  ${}^5D_0 \rightarrow {}^7F_1$  reference transition (magnetic dipole mechanism), therefore this transition is practically insensitive to chemical environment changing, Eq. (2).

$$A_{0\lambda} = \frac{\nu_{01}}{\nu_{0\lambda}} \frac{S_{0\lambda}}{S_{01}} (A_{01}) \quad (2)$$

Where  $S_{01}$  and  $S_{0\lambda}$  are the areas under the curves of the  ${}^5D_0 \rightarrow {}^7F_1$  and  ${}^5D_0 \rightarrow {}^7F_\lambda$  transitions, with  $\nu_{01}$  and  $\nu_{0\lambda}$  being their energy barycenters respectively.

### 1.2. Theoretical calculations

The luminescent properties were calculated using the LUMPAC program.<sup>3</sup> Initially, the Judd-Ofelt theory was used to calculate the intensity parameters  $\Omega_\lambda$  ( $\lambda = 2, 4, \text{ and } 6$ ) (Eq (3)).<sup>4,5</sup>

$$\Omega_\lambda = (2\lambda + 1) \sum_{t=\lambda-1}^{\lambda+1(\text{odd})} \sum_{p=-t}^{t(\text{all})} \frac{|B_{\lambda tp}|^2}{(2t+1)} \quad (3)$$

Where the  $B_{\lambda tp}$  term is the sum of the forced electric dipole (ed) dynamics coupling (dc) contributions (Eq. (4)):

$$B_{\lambda tp} = \frac{2}{\Delta E} \langle r^{t+1} \rangle \theta(t, \lambda) \gamma_p^t + \left( - \left[ \frac{(\lambda+1)(2\lambda+3)}{2\lambda+1} \right]^{\frac{1}{2}} \langle r^\lambda \rangle (1-\sigma_\lambda) \langle f \| C^{(\lambda)} \| f \rangle \Gamma_p^t \delta_{t, \lambda+1} \right) \quad (4)$$

All the terms appearing in this equation are thoroughly explained in the reference<sup>6</sup> and in the LUMPAC homepage (<https://www.lumpac.pro.br/theory>).

The calculation of intensity parameters depends on the charge factors and polarizabilities associated with the bonds between the  $\text{Eu}^{3+}$  ion and the ligand atoms. Since there are no analytical equations for calculating these quantities, we proceed with their adjustment using the QDC model,<sup>7</sup> aiming to fit the calculated  $\Omega_2$  and  $\Omega_4$  parameters to their respective experimental values.

From the calculated intensity parameters, it was possible to calculate the energy transfer and back transfer rates using the model developed by Malta and coworkers.<sup>8</sup> According to this model, the energy transfer rates, WET, can be determined from the sum of two terms (Eq. (5)):

$$W_{ET} = W_{ET}^{mm} + W_{ET}^{em} \quad (5)$$

The  $W_{ET}^{mm}$  term corresponds to the energy transfer rate obtained from the multipolar mechanism (Eq. (6)):

$$W_{ET}^{mm} = \frac{2\pi}{\hbar} = \frac{e^2 S_L}{(2J+1)G} F \sum_\lambda \gamma_\lambda \langle \alpha' J' \| U^{(\lambda)} \| \alpha J \rangle^2 + \frac{4\pi}{\hbar} \frac{e^2 S_L}{(2J+1)GR_L^6} F \sum_\lambda \Omega_\lambda^{ed} \langle \alpha' J' \| U^{(\lambda)} \| \alpha J \rangle^2 \quad (6)$$

and the  $W_{ET}^{em}$  term refers to the energy transfer rates obtained from the exchange mechanism (Eq. (7)):

$$W_{ET}^{em} = \frac{8\pi}{3\hbar} \frac{e^2 (1-\sigma_0)^2}{(2J+1)R_L^4} F \langle \alpha' J' \| S \| \alpha J \rangle^2 \sum_m \left| \left\langle \varphi \left| \sum_k \mu_z(k) s_m(k) \right| \varphi' \right\rangle \right|^2 \quad (7)$$

All the terms appearing in this equation are thoroughly explained in the reference<sup>6</sup> and in the LUMPAC homepage (<https://www.lumpac.pro.br/theory>).

$$A({}^5D_0 - {}^7F_J) = \frac{64\pi^4\nu^3}{3h(2J+1)} \left[ \frac{n(n^2+2)^2}{9} S_{ed} + n^3 S_{md} \right] \quad (8)$$

The intensity parameters were also used to determine the radiative emission rate ( $A_{rad}$ ). The non-radiative emission rate ( $A_{nrad}$ ) was calculated from  $A_{rad}$  according to Equation (9).

$$\frac{1}{\tau} = A_{rad} + A_{nrad} \quad (9)$$

The energy transfer and back transfer rates, along with the rates of radiative and non-radiative emission, made it possible to calculate, from Equations (10) and (11), the quantum efficiency ( $\eta$ ) and the quantum yield ( $q$ ).

$$\eta = \frac{A_{rad}}{A_{rad} + A_{nrad}} \quad (10)$$

$$q = \frac{A_{rad}\eta_{5D_0}}{\varphi\eta_{S_0}} \quad (11)$$

where  $\eta_{5D_0}$  is the  ${}^5D_0$  level population. and  $\eta_{S_0}$  correspond to the  $S_0$  singlet level population and absorption rate, respectively.

## 2. Figures

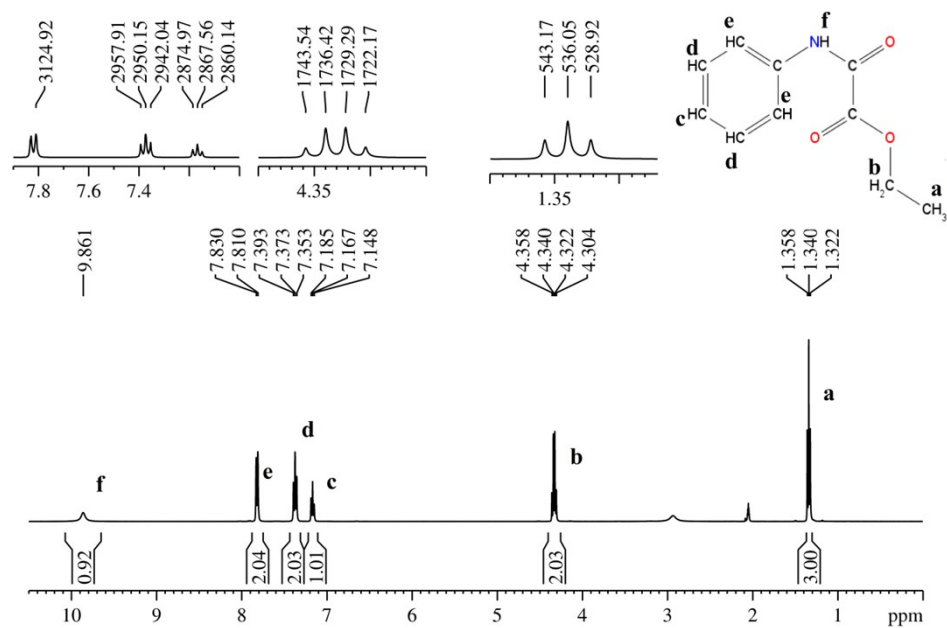

**Fig. S1** <sup>1</sup>H NMR spectrum for Etphox in (CD<sub>3</sub>)<sub>2</sub>CO (400 MHz, r. t.).

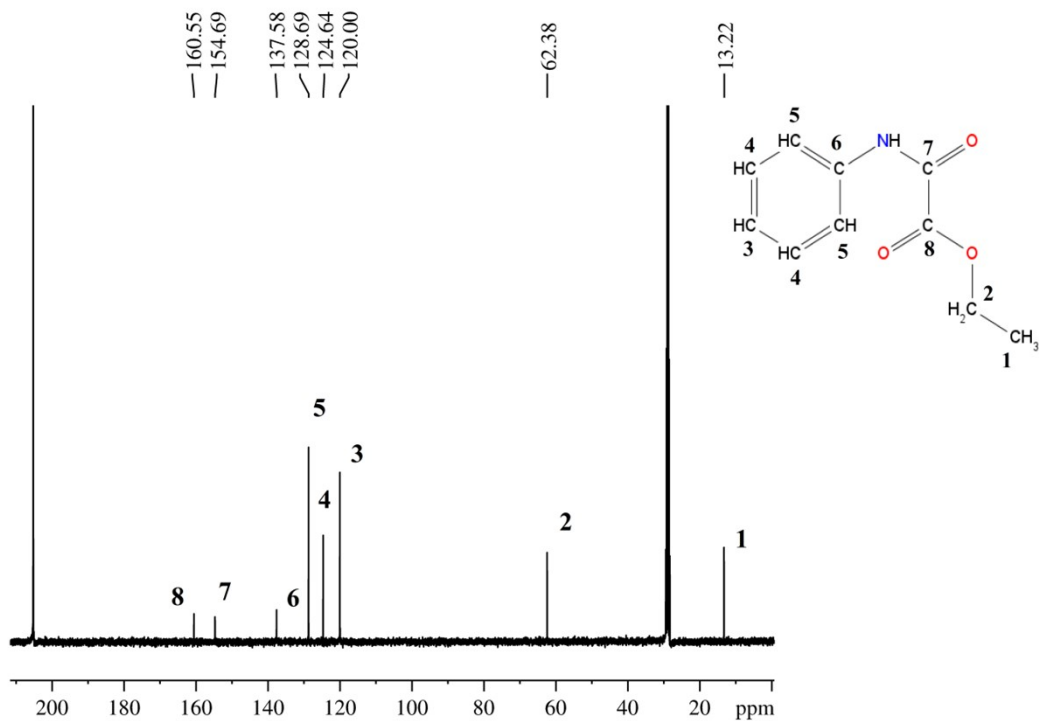

**Fig. S2** <sup>13</sup>C NMR spectrum for Etphox in (CD<sub>3</sub>)<sub>2</sub>CO (101 MHz, r. t.).

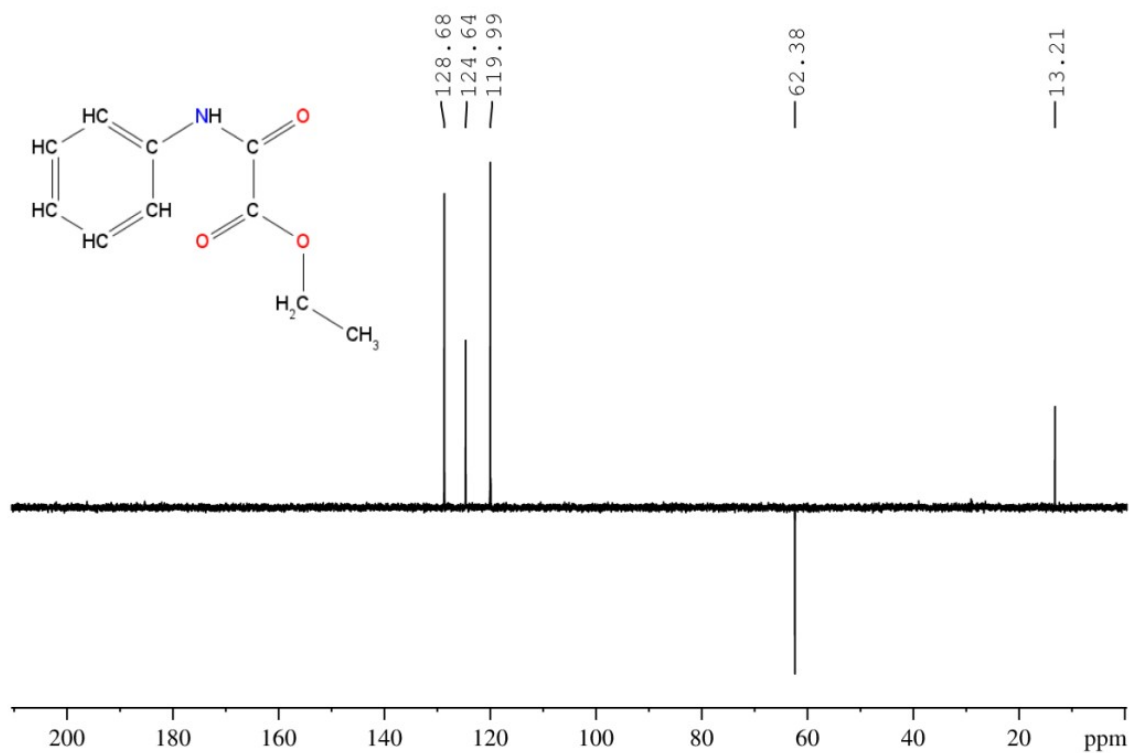

**Fig. S3**  $^{13}\text{C}$  DEPT-135 spectrum for Etphox in  $(\text{CD}_3)_2\text{CO}$  (101 MHz, r. t.).

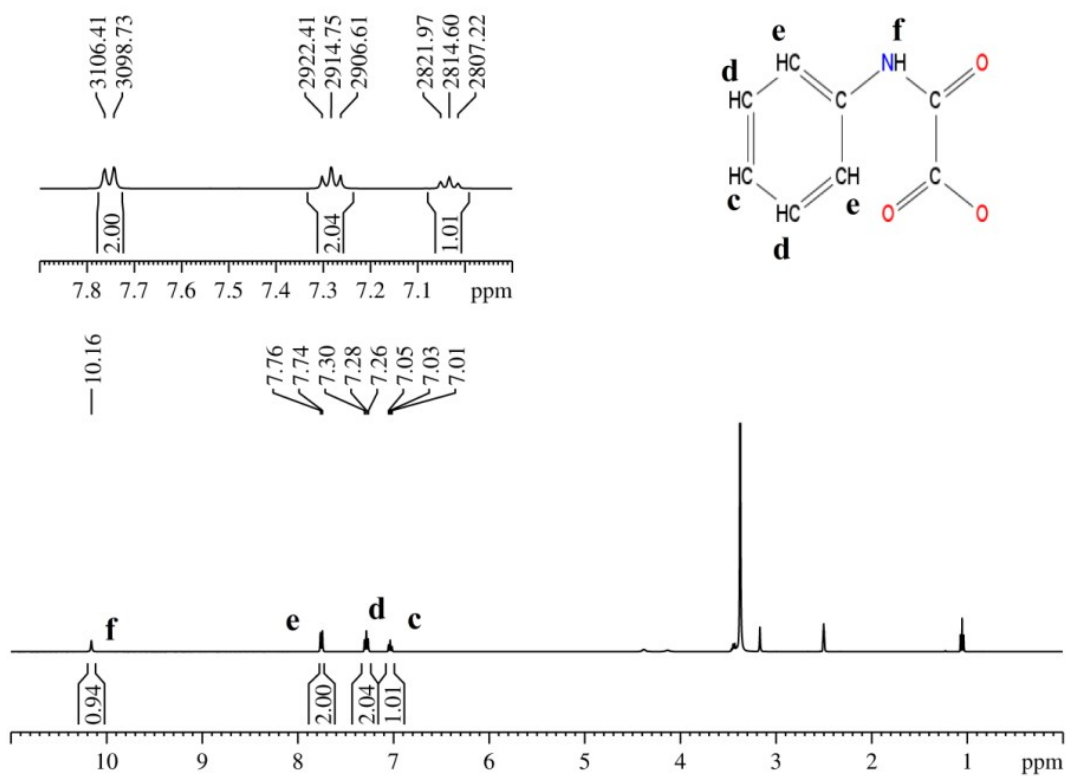

**Fig. S4**  $^1\text{H}$  NMR spectrum for Naphox in  $(\text{CD}_3)_2\text{SO}$  (400 MHz, r. t.).

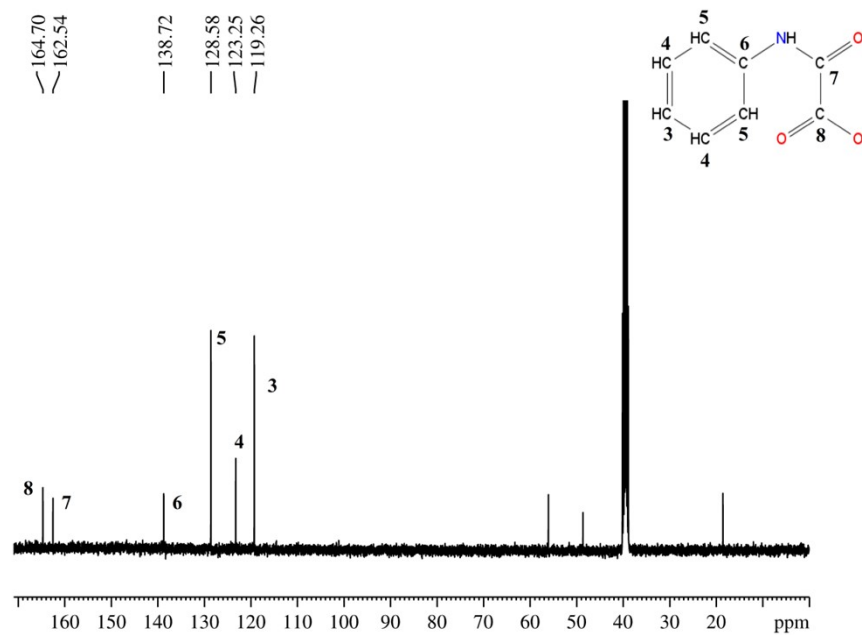

**Fig. S5**  $^{13}\text{C}$  NMR spectrum for Etpfox in  $(\text{CD}_3)_2\text{CO}$  (101 MHz, r. t.).

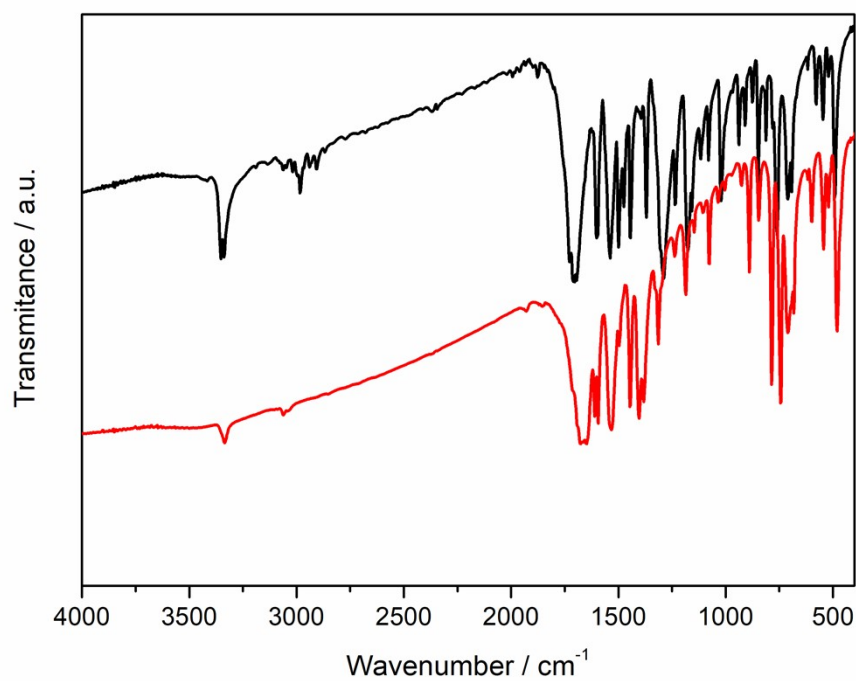

**Fig. S6** IR spectra of Etpfox (black line) and Naphox (red line).



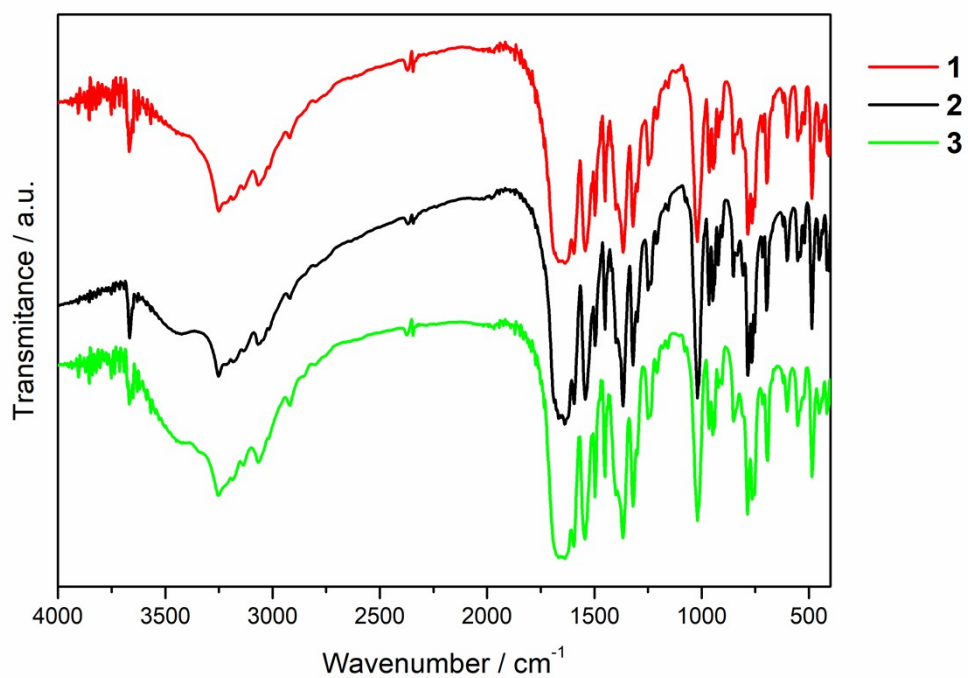

Fig. S7 IR data of 1, 2 and 3.

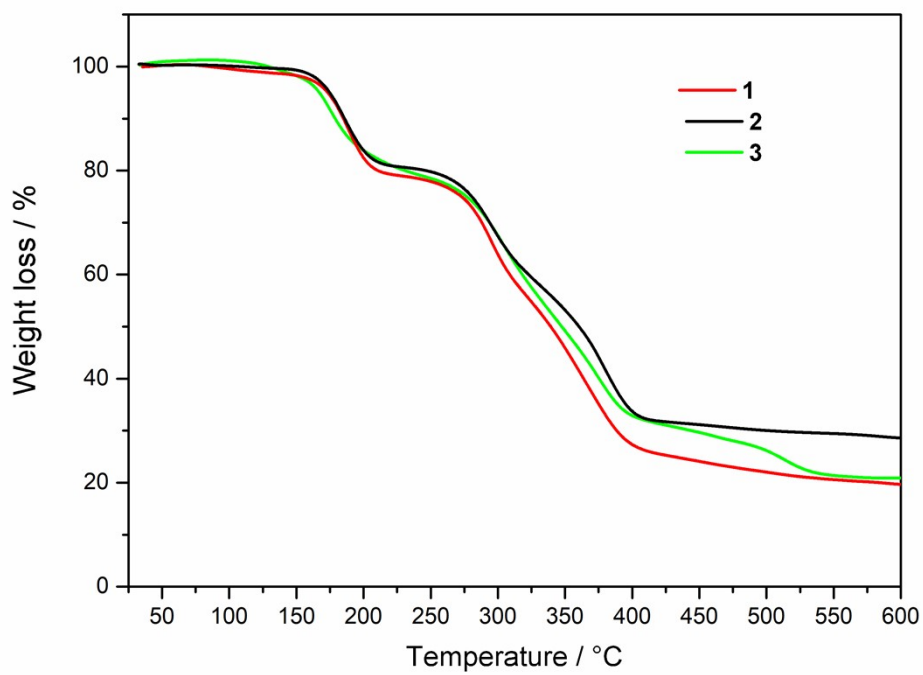

Fig. S8 TG curves of 1, 2 and 3.

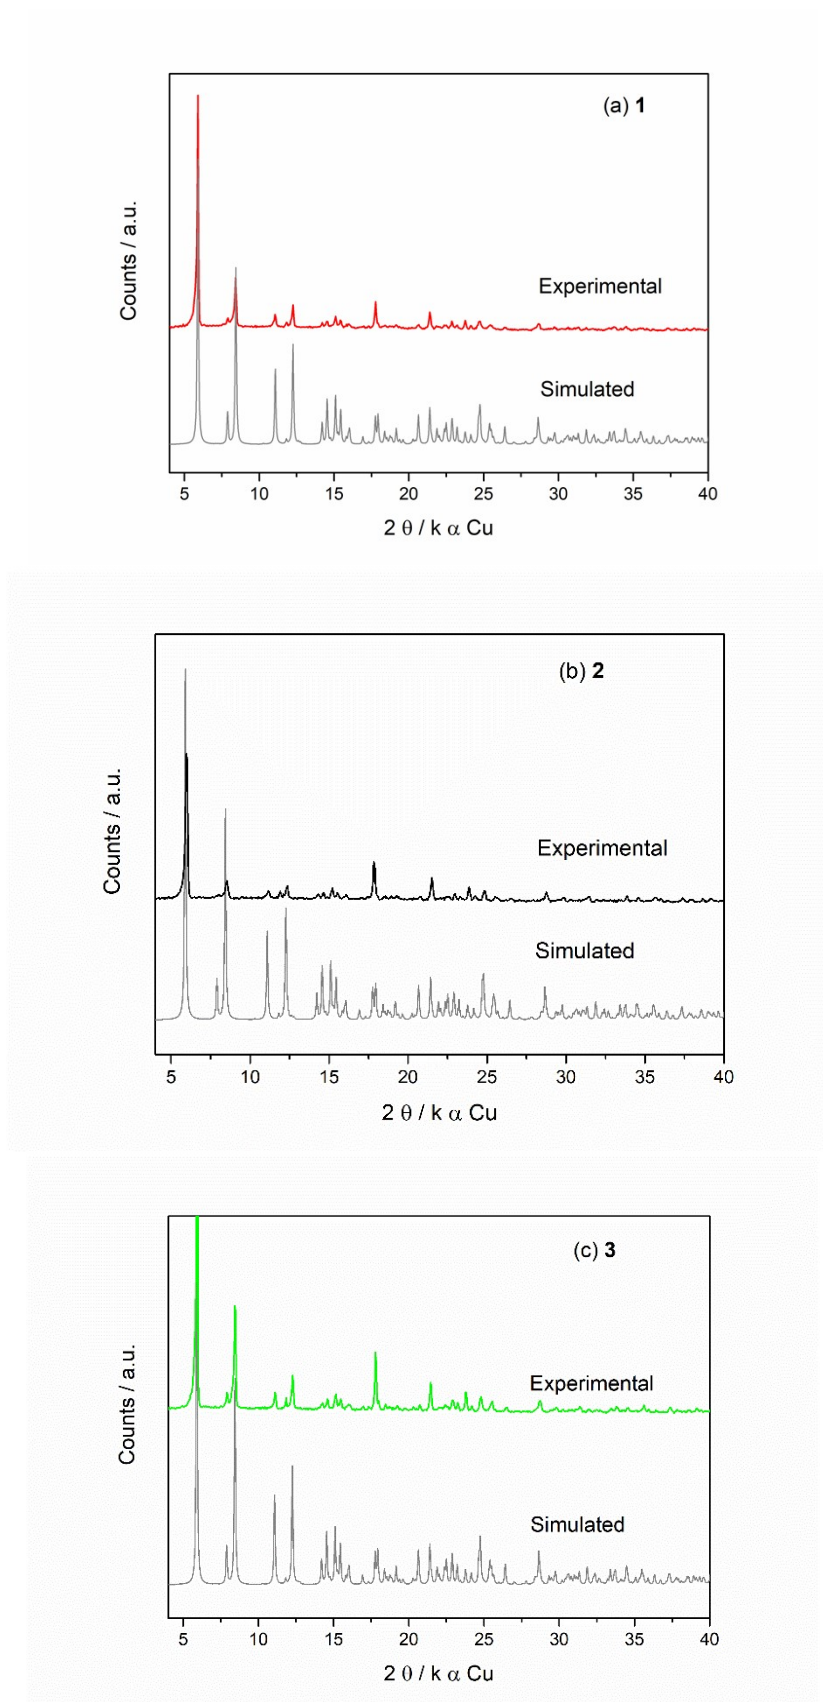

**Fig. S9** Experimental and simulated X-ray diffraction patterns of (a) **1**, (b) **2** and (c) **3**.

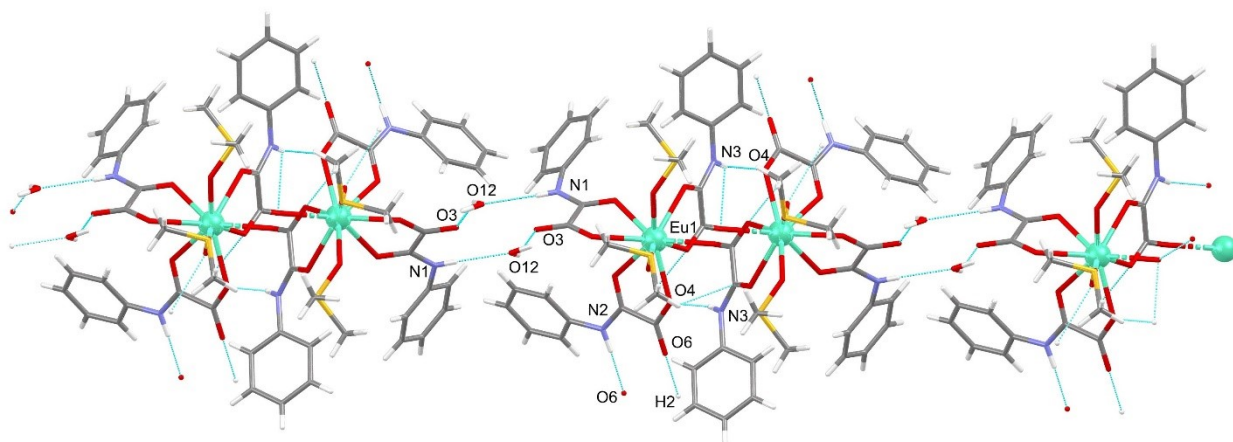

**Fig. S10** Representation of the one-dimensional network of **1** by hydrogen bonds view through the [010] direction. Interactions are represented by cyan dashed lines.

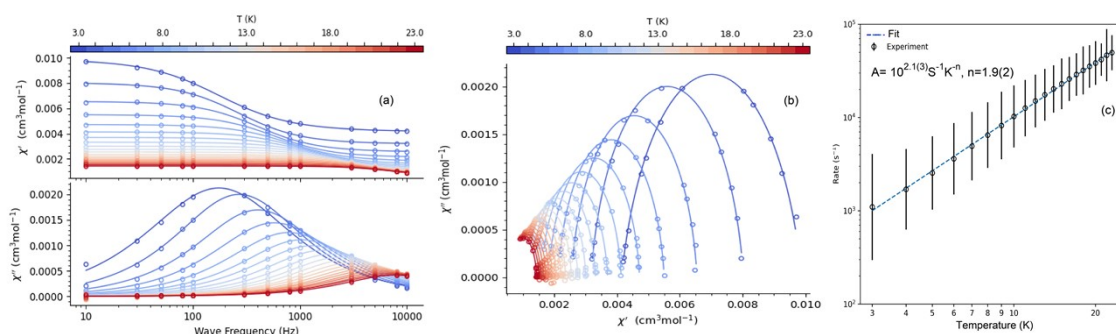

**Fig. S11** Ac susceptibility data for **2**. (a) Frequency dependence of the in-phase ( $\chi'$ ) and out-of-phase ( $\chi''$ ) components of the ac magnetic susceptibility taken at various temperatures using a dc magnetic field of 1 kOe; solid lines correspond to the fit using the generalized Debye model. (b) Cole-Cole plot using the dc magnetic field of 1 kOe with solid lines corresponding to the generalized Debye model fitting results. (c) Temperature dependence of the relaxation time and their fit using the phonon bottleneck effect.

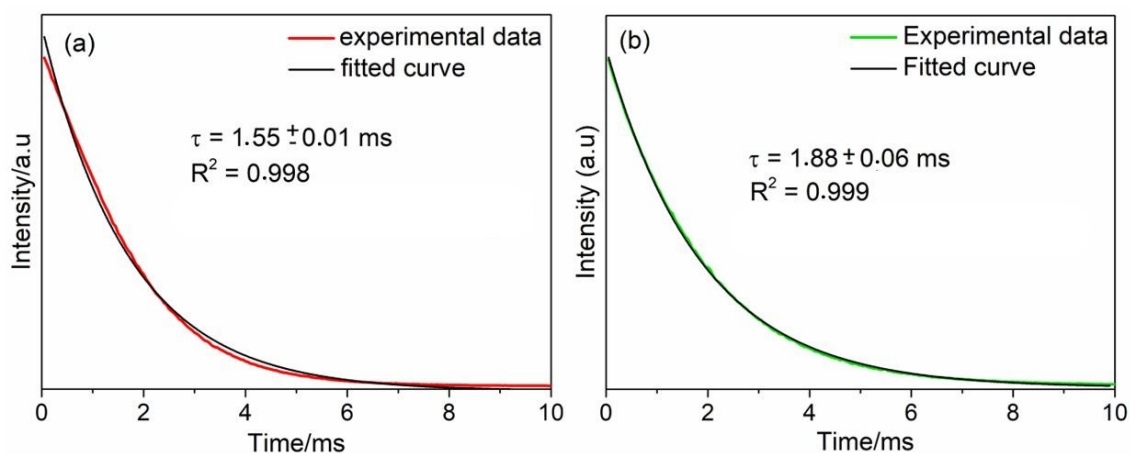

**Fig. S12** Lifetime decay for (a) **1** and (b) **3**, under excitation at 275.2 nm and 276.2 nm, respectively.

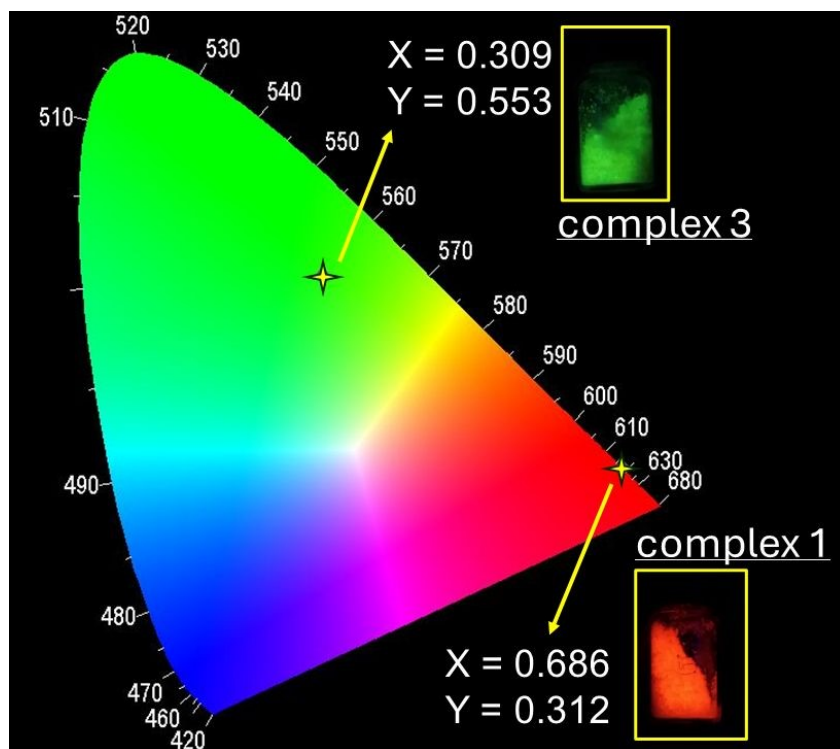

**Fig. S13** Chromaticity diagram obtained from the emission spectra of the **1** and **3** oxamate complexes. The inserts display photographs of complexes **1** and **3** obtained with a digital camera indicating the intense photoluminescence in the red region observed under UV irradiation.

### 3. Tables

**Table S1.** Selected bond lengths (Å) and angles (°) for **1**.

| Bond lengths (Å)        |          | Bond angles (°)               |            |
|-------------------------|----------|-------------------------------|------------|
| Eu(1)–O(1)              | 2.423(6) | O(1)–Eu(1)–O(9) <sup>i</sup>  | 141.3(2)   |
| Eu(1)–O(2)              | 2.522(6) | O(10)–Eu(1)–O(9) <sup>i</sup> | 73.86(19)  |
| Eu(1)–O(4)              | 2.460(6) | O(1)–Eu(1)–O(4)               | 107.3(2)   |
| Eu(1)–O(5)              | 2.488(5) | O(4)–Eu(1)–O(7)               | 70.81(19)  |
| Eu(1)–O(7)              | 2.487(6) | O(4)–Eu(1)–O(5)               | 64.57(19)  |
| Eu(1)–O(8)              | 2.507(5) | O(10)–Eu(1)–O(8)              | 138.72(18) |
| Eu(1)–O(9) <sup>i</sup> | 2.460(6) | O(11)–Eu(1)–O(7)              | 134.17(19) |
| Eu(1)–O(10)             | 2.436(6) | O(11)–Eu(1)–O(10)             | 74.7(2)    |
| Eu(1)–O(11)             | 2.378(6) | O(11)–Eu(1)–O(1)              | 75.8(2)    |

Symmetry operations (i) =  $-x+3/2, y-1/2, -z+3/2$ .

**Table S2.** Selected bond lengths (Å) and angles (°) for **2**.

| Bond lengths (Å) |           | Bond angles (°) |            |
|------------------|-----------|-----------------|------------|
| Gd1–O2           | 2.444 (2) | O2–Gd1–O3       | 64.65 (8)  |
| Gd1–O3           | 2.476 (2) | O2–Gd1–O4       | 75.17 (8)  |
| Gd1–O4           | 2.435 (2) | O2–Gd1–O5i      | 70.35 (8)  |
| Gd1–O5i          | 2.483 (2) | O2–Gd1–O6       | 128.64 (8) |
| Gd1–O6           | 2.487 (2) | O2–Gd1–O7       | 107.51 (9) |
| Gd1–O7           | 2.409 (3) | O2–Gd1–O9       | 131.65 (8) |
| Gd1–O9           | 2.510 (3) | O2–Gd1–O10      | 140.76 (9) |
| Gd1–O10          | 2.370 (2) | O2–Gd1–O11      | 69.47 (8)  |
| Gd1–O11          | 2.429 (2) | O4–Gd1–O3       | 137.74 (8) |
|                  |           | O3–Gd1–O5i      | 73.21 (8)  |
|                  |           | O3–Gd1–O6       | 118.85 (8) |
|                  |           | O3–Gd1–O7       | 68.03 (9)  |
|                  |           | O3–Gd1–O9       | 68.99 (9)  |
|                  |           | O3–Gd1–O10      | 141.71 (9) |
|                  |           | O3–Gd1–O11      | 102.33 (9) |
|                  |           | O4–Gd1–O5i      | 81.75 (8)  |
|                  |           | O4–Gd1–O6       | 76.64 (8)  |
|                  |           | O4–Gd1–O7       | 140.73 (9) |
|                  |           | O4–Gd1–O9       | 142.02 (8) |
|                  |           | O4–Gd1–O10      | 79.23 (9)  |
|                  |           | O4–Gd1–O11      | 73.83 (8)  |
|                  |           | O5i–Gd1–O6      | 63.76 (7)  |
|                  |           | O5i–Gd1–O7      | 136.93 (9) |
|                  |           | O5i–Gd1–O9      | 84.16 (9)  |
|                  |           | O5i–Gd1–O10     | 134.31 (8) |
|                  |           | O5i–Gd1–O11     | 136.99 (9) |
|                  |           | O7–Gd1–O6       | 121.38 (9) |
|                  |           | O6–Gd1–O9       | 65.49 (8)  |
|                  |           | O6–Gd1–O10      | 71.56 (8)  |
|                  |           | O6–Gd1–O11      | 138.79 (8) |
|                  |           | O7–Gd1–O9       | 65.17 (9)  |
|                  |           | O7–Gd1–O10      | 75.39 (10) |
|                  |           | O7–Gd1–O11      | 71.02 (9)  |
|                  |           | O9–Gd1–O10      | 85.98 (10) |
|                  |           | O9–Gd1–O11      | 135.40 (9) |
|                  |           | O10–Gd1–O11     | 75.16 (9)  |

Symmetry operations (i) =  $-x+3/2, y-1/2, -z+1/2$ .

**Table S3.** Selected bond lengths (Å) and angles (°) for **3**.

| Bond lengths (Å)         |          | Bond angles (°)               |            |
|--------------------------|----------|-------------------------------|------------|
| Tb(01)–O(1)              | 2.450(3) | O(1)–Eu(1)–O(9) <sup>i</sup>  | 70.55(11)  |
| Tb(01)–O(2)              | 2.494(3) | O(10)–Eu(1)–O(9) <sup>i</sup> | 134.27(12) |
| Tb(01)–O(4)              | 2.416(4) | O(1)–Eu(1)–O(4)               | 107.43(12) |
| Tb(01)–O(5)              | 2.533(3) | O(4)–Eu(1)–O(7)               | 140.89(12) |
| Tb(01)–O(7)              | 2.454(3) | O(4)–Eu(1)–O(5)               | 64.86(12)  |
| Tb(01)–O(8) <sup>i</sup> | 2.504(3) | O(10)–Eu(1)–O(8)              | 71.55(11)  |
| Tb(01)–O(9) <sup>i</sup> | 2.498(3) | O(11)–Eu(1)–O(7)              | 73.75(11)  |
| Tb(01)–O(10)             | 2.381(3) | O(11)–Eu(1)–O(10)             | 74.81(2)   |
| Tb(01)–O(11)             | 2.436(3) | O(11)–Eu(1)–O(1)              | 69.56(11)  |

Symmetry operations (i) =  $-x+1/2, y+1/2, -z+1/2$ .

**Table S4.** CShM calculations of the coordination environment at metal(III) ion in all complexes of ML<sub>9</sub> coordination sphere.<sup>a</sup>

| Compound | EP-9   | OPY-9  | HBPY-9 | JTC-9  | JCCU-9 | CCU-9 | JCSAPR-9 | CSAPR-9 | JTCTPR-9 | TCTPR-9 | JTDIC-9 | HH-9   | MFF-9 |
|----------|--------|--------|--------|--------|--------|-------|----------|---------|----------|---------|---------|--------|-------|
| <b>1</b> | 37.134 | 22.108 | 18.815 | 15.670 | 11.117 | 9.647 | 1.523    | 0.398   | 3.038    | 1.234   | 12.591  | 11.417 | 0.453 |
| <b>2</b> | 37.154 | 22.081 | 18.912 | 15.760 | 11.079 | 9.599 | 1.519    | 0.381   | 3.025    | 1.207   | 12.689  | 11.361 | 0.453 |
| <b>3</b> | 37.173 | 22.054 | 18.903 | 15.690 | 11.093 | 9.600 | 1.544    | 0.393   | 3.070    | 1.225   | 12.617  | 11.400 | 0.455 |

<sup>a</sup>Abbreviations: EP-9 = Enneagon (D<sub>9h</sub>); OPY-9= Octagonal pyramid (C<sub>8v</sub>); HBPY-9 = Heptagonal bipyramid (D<sub>7h</sub>); JTC-9 = Johnson triangular cupola J3 (C<sub>3v</sub>); JCCU-9 = Capped cube J8 (C<sub>4v</sub>); CCU-9 = Spherical-relaxed capped cube (C<sub>4v</sub>); JCSAPR-9 = Capped square antiprism J10 (C<sub>4v</sub>); CSAPR-9 = Spherical capped square antiprism (C<sub>4v</sub>); JTCTPR-9 = Tricapped trigonal prism J51 (D<sub>3h</sub>); TCTPR-9 = Spherical tricapped trigonal prism (D<sub>3h</sub>); JTDIC-9 = Tridiminished icosahedron J63 (C<sub>3v</sub>); HH-9 = Hula-hoop (C<sub>2v</sub>); MFF-9 = Muffin (C<sub>s</sub>)



**Table S5.** Debye parameters from the AC susceptibility data were measured with an applied magnetic field of 1 kOe for **2**.

| T / K | $\tau$ / s | $\chi_T$ / cm <sup>3</sup> mol <sup>-1</sup> K | $\chi_s$ / cm <sup>3</sup> mol <sup>-1</sup> K | $\alpha$ |
|-------|------------|------------------------------------------------|------------------------------------------------|----------|
| 3     | 9.10E-4    | 0.001194                                       | 0.009895                                       | 0.19     |
| 4     | 5.88E-4    | 0.003171                                       | 0.008031                                       | 0.12     |
| 5     | 3.93E-4    | 0.002549                                       | 0.006551                                       | 0.11     |
| 6     | 2.77E-4    | 0.002123                                       | 0.005503                                       | 0.10     |
| 7     | 2.03E-4    | 0.001820                                       | 0.004719                                       | 0.09     |
| 8     | 1.54E-4    | 0.001592                                       | 0.004132                                       | 0.09     |
| 9     | 1.22E-4    | 0.001407                                       | 0.003699                                       | 0.09     |
| 10    | 9.74E-5    | 0.001273                                       | 0.003315                                       | 0.08     |
| 11    | 7.95E-5    | 0.001163                                       | 0.003003                                       | 0.07     |
| 12    | 6.66E-5    | 0.001069                                       | 0.002751                                       | 0.06     |
| 13    | 5.70E-5    | 9.890E-04                                      | 0.002541                                       | 0.06     |
| 14    | 4.95E-5    | 9.199E-04                                      | 0.002363                                       | 0.05     |
| 15    | 4.35E-5    | 8.562E-04                                      | 0.002209                                       | 0.05     |
| 16    | 3.86E-5    | 8.104E-04                                      | 0.002064                                       | 0.04     |
| 17    | 3.46E-5    | 7.660E-04                                      | 0.001938                                       | 0.04     |
| 18    | 3.13E-5    | 7.222E-04                                      | 0.001833                                       | 0.04     |
| 19    | 2.84E-5    | 6.815E-04                                      | 0.001738                                       | 0.04     |
| 20    | 2.61E-5    | 6.586E-04                                      | 0.001647                                       | 0.03     |
| 21    | 2.38E-5    | 6.199E-04                                      | 0.001572                                       | 0.03     |
| 22    | 2.18E-5    | 5.910E-04                                      | 0.001498                                       | 0.03     |
| 23    | 2.02E-5    | 5.677E-04                                      | 0.001431                                       | 0.03     |

**Table S6.** Debye parameters from the AC susceptibility data were measured with an applied magnetic field of 2.5 kOe for **2**.

| T / K | $\tau$ / s | $\chi_T$ / cm <sup>3</sup> mol <sup>-1</sup> K | $\chi_s$ / cm <sup>3</sup> mol <sup>-1</sup> K | $\alpha$ |
|-------|------------|------------------------------------------------|------------------------------------------------|----------|
| 3     | 0.001658   | 3.43E-4                                        | 0.002614                                       | 0.27     |
| 4     | 0.001244   | 2.9E-4                                         | 0.002753                                       | 0.15     |
| 5     | 8.848E-04  | 2.4E-4                                         | 0.002476                                       | 0.11     |
| 6     | 6.258E-04  | 2.02E-4                                        | 0.002148                                       | 0.10     |
| 7     | 4.535E-04  | 1.74E-4                                        | 0.001870                                       | 0.09     |
| 8     | 3.372E-04  | 1.5E-4                                         | 0.001650                                       | 0.08     |
| 9     | 2.573E-04  | 1.34E-4                                        | 0.001464                                       | 0.07     |
| 10    | 2.024E-04  | 1.20E-4                                        | 0.001324                                       | 0.07     |
| 11    | 1.613E-04  | 1.10E-4                                        | 0.001198                                       | 0.06     |
| 12    | 1.322E-04  | 1.01E-4                                        | 0.001101                                       | 0.06     |
| 13    | 1.100E-04  | 9.35E-5                                        | 0.001016                                       | 0.05     |
| 14    | 9.286E-05  | 8.76E-5                                        | 9.418E-04                                      | 0.04     |
| 15    | 7.983E-05  | 8.26E-5                                        | 8.804E-04                                      | 0.04     |
| 16    | 6.943E-05  | 7.82E-5                                        | 8.249E-04                                      | 0.04     |
| 17    | 6.090E-05  | 7.41E-5                                        | 7.742E-04                                      | 0.03     |
| 18    | 5.452E-05  | 6.93E-5                                        | 7.346E-04                                      | 0.04     |
| 19    | 4.903E-05  | 6.66E-5                                        | 6.976E-04                                      | 0.04     |
| 20    | 4.422E-05  | 6.26E-5                                        | 6.643E-04                                      | 0.04     |
| 21    | 3.995E-05  | 6.10E-5                                        | 6.292E-04                                      | 0.03     |
| 22    | 3.640E-05  | 5.91E-5                                        | 5.993E-04                                      | 0.03     |
| 23    | 3.340E-05  | 5.68E-5                                        | 5.739E-04                                      | 0.02     |
| 24    | 3.069E-05  | 5.42E-5                                        | 5.500E-04                                      | 0.02     |
| 25    | 2.825E-05  | 5.31E-5                                        | 5.258E-04                                      | 0.02     |
| 26    | 2.618E-05  | 5.21E-5                                        | 5.053E-04                                      | 0.02     |
| 27    | 2.428E-05  | 5.39E-5                                        | 4.820E-04                                      | 0.01     |
| 28    | 2.274E-05  | 5.07E-5                                        | 4.684E-04                                      | 0.01     |
| 29    | 2.109E-05  | 4.45E-5                                        | 4.558E-04                                      | 0.02     |
| 30    | 1.965E-05  | 4.38E-5                                        | 4.388E-04                                      | 0.02     |
| 31    | 1.834E-05  | 4.16E-5                                        | 4.246E-04                                      | 0.02     |
| 32    | 1.719E-05  | 4.01E-5                                        | 4.113E-04                                      | 0.02     |
| 33    | 1.615E-05  | 3.99E-5                                        | 3.976E-04                                      | 0.01     |

**Table S7.** Spherical Atomic Coordinates for the Sparkle/PM3 model Coordination Polyhedron, Charge Factors (g), and the Polarizability ( $\alpha$ ) of the Coordinated Ligating Atoms for **1**.

| Atom | R (Å)  | $\Theta$ (°) | $\Phi$ (°) | g      | $\alpha$ (Å <sup>3</sup> ) |
|------|--------|--------------|------------|--------|----------------------------|
| Eu   | 0.0000 | 0.00         | 0.00       | -      | -                          |
| O    | 2.4534 | 79.09        | 73.09      | 0.2396 | 6.1792                     |
| O    | 2.4975 | 94.28        | 358.46     | 0.2434 | 3.3989                     |
| O    | 2.4813 | 21.75        | 337.99     | 0.2433 | 3.9535                     |
| O    | 2.4902 | 134.72       | 240.74     | 0.2435 | 4.2736                     |
| O    | 2.5123 | 88.41        | 301.34     | 0.2361 | 4.7835                     |
| O    | 2.5131 | 34.88        | 153.63     | 0.2372 | 5.5842                     |
| O    | 2.5104 | 80.11        | 222.36     | 0.2366 | 5.1597                     |
| O    | 2.4430 | 153.51       | 49.21      | 0.2479 | 3.6369                     |
| O    | 2.4358 | 106.83       | 143.58     | 0.2477 | 3.7028                     |

## References

- <sup>1</sup> W. T. Carnall, H. M. Crosswhite, "Energy Structure and Transitions Probabilities in  $LnF_3$  of the Trivalent Lanthanides", Argonne National Laboratory Report, Argonne, IL, 1977.
- <sup>2</sup> R. Pavithran, N. S. S. Kumar, S. Biju, M. L. P. Reddy, S.A. Júnior, R. O. Freire, *Inorg. Chem.* 45 (2006) p. 2184 – 2192.
- <sup>3</sup> J. D. L. Dutra, T. D. Bispo, R. O. Freire, *J. Comput. Chem.* 35 (2014) p. 772 – 775.
- <sup>4</sup> B. R. Judd, *Phys. Rev.* 127 (1962) 750 – 761.
- <sup>5</sup> G. S. Ofelt, *J. Chem. Phys.* 37 (1962) 511 – 520.
- <sup>6</sup> E. M. Gomes, D. F. Franco, S. L. Scarpari, M. V. Colaço, M. S. Ferreira, R. O. Freire, L. F., *J. Lumin.* 210 (2019) p. 104 – 118.
- <sup>7</sup> J.D.L. Dutra, N.B.D. Lima, R.O. Freire, A.M. Simas, *Sci. Rep.* 5 (2015), 13695.
- <sup>8</sup> Carneiro Neto, A. N.; Teotonio, E. E. S.; de Sa, G. F.; Brito, H. F.; Legendziewicz, J.; Carlos, L. D.; Felinto, M. C. F. C.; Gawryszewskae, P.; Moura Jr, R. T.; Longo, R. L.; Faustino, W. M.; Malta, O. L. Modeling intramolecular energy transfer in lanthanide chelates: A critical review and recent advances. Chapter 310 - Modeling intramolecular energy transfer in lanthanide chelates: A critical review and recent advances, in Handbook on the Physics and Chemistry of Rare Earths, J.-C. G. Bunzli and V. K. Pecharsky, Editors. 2019, Elsevier. p. 55-162. doi:10.1016/bs.hpcr.2019.08.001.
